# Supplementary figures and images for: Pre-clinical immunogenicity of human papillomavirus alpha-7 and alpha-9 major capsid proteins
Source: PubMed Central journal article supplement — Vaccine. 2014 Nov 12;32(48):6548–55. doi: 10.1016/j.vaccine.2014.07.116 (PMC4228199; doi:10.1016/j.vaccine.2014.07.116), 2014-11-12

Supplementary Figure S1

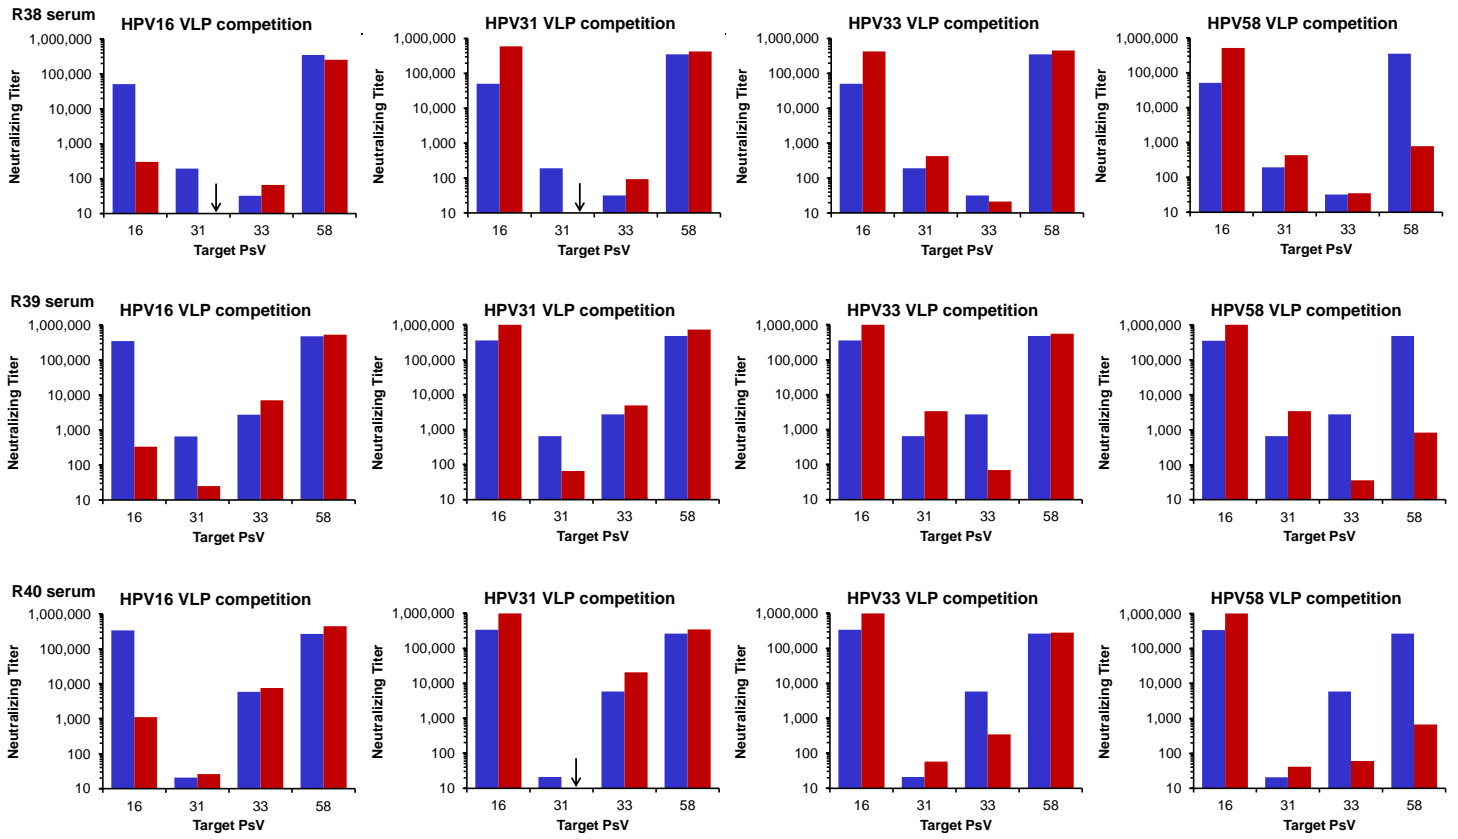

Supplement: mmc1.pdf [file mmc1.pdf]
